# Supplementary material for: Scanning tunneling microscopy and Raman evidence of silicene nanosheets intercalated into graphite surfaces at room temperature
Source: Royal Society of Chemistry journal article supplement (doi:10.1039/c9nr00343f), 2019-01-01
Supplement: c9nr00343f1.pdf [file c9nr00343f1.pdf]

## Electronic Supplementary Information

### Scanning tunneling microscopy and Raman evidences of silicene nanosheets intercalated into graphite surface at room temperature

I.Kupchak<sup>1</sup>, F.Fabbri<sup>2</sup>, M.De Crescenzi<sup>3</sup>, M. Scarselli<sup>3</sup>, M. Salvato<sup>3</sup>, T.Delise<sup>3</sup>, I.Berberzier<sup>4</sup>, O.Pulci<sup>3</sup> and P. Castrucci<sup>3,\*</sup>

<sup>1</sup> *V. E. Lashkaryov Institute of Semiconductor Physics, National Academy of Sciences of Ukraine, Ukraine*

<sup>2</sup> *NEST, Scuola Normale Superiore, Istituto Nanoscienze-CNR, Pisa, 56127, Italy.*

<sup>3</sup> *Dipartimento di Fisica, Università di Roma "Tor Vergata", 00133 Roma, Italy.*

<sup>4</sup> *CNRS, Aix-Marseille Université, IM2NP, UMR 7334, Campus de St. Jérôme, 13397 Marseille, France.*

\* e-mail: [paola.castrucci@roma2.infn.it](mailto:paola.castrucci@roma2.infn.it)

#### **Abstract:**

Highly oriented pyrolytic graphite (HOPG) is an inert substrate with a structural honeycomb lattice, well suited for the growth of two-dimensional (2D) silicene layer. It was reported that when Si atoms are deposited on HOPG surface at room temperature, they arrange in two configurations: silicene nanosheets and three dimensional clusters. In this work we demonstrate, by using scanning tunneling microscopy (STM) and Raman spectroscopy, that a third configuration stabilizes in the form of Si 2D nanosheets intercalated below the first top layer of carbon atoms. The Raman spectra reveal a structure located at  $538\text{ cm}^{-1}$  which we ascribe to the presence of  $sp^2$  Si hybridization. Moreover, the silicon deposition induces several modifications in the graphite D and G Raman modes, which we interpret as an experimental evidence of the intercalation of the silicene nanosheets. The Si atom intercalation at room temperature takes place at the HOPG step edges and it detaches only the outermost graphene layer inducing a strong tensile strain mainly concentrated on the edges of the silicene nanosheets. Theoretical calculations of the structure and energetic viability of the silicene nanosheets, of the strain distribution on the outermost graphene layer and its influence on the Raman resonances support the STM and Raman observations.

Fig. S1: Raman spectra deconvolution with Voigt curves. Raman peak parameters are reported in Table S1 and Table S2. The Voigt deconvolution reveals the doubling of the D and G peaks, showing an additional peak for each mode. In Table S2 presents the parameters of the Raman modes of the  $sp^3$  silicon ( $517\text{ cm}^{-1}$ ) and of silicene located at  $538\text{ cm}^{-1}$

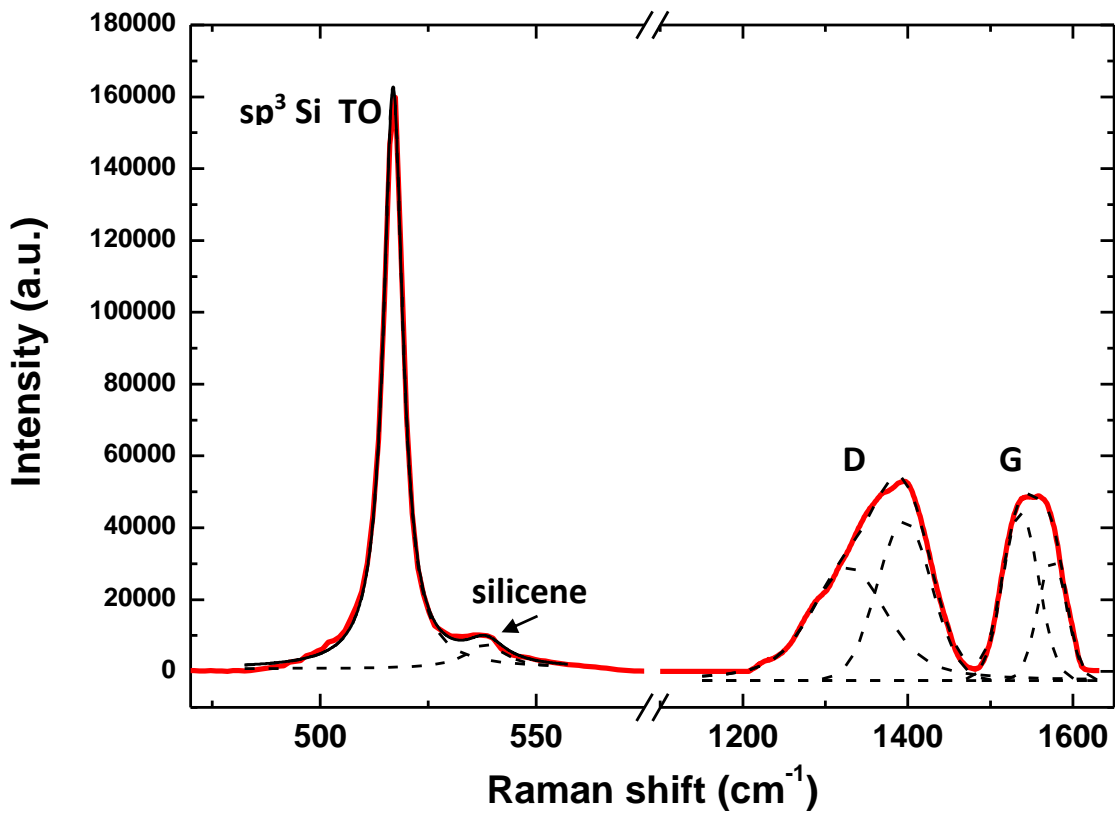

Table S1

|        | Before Silicon Deposition       |                          |                                   | After Silicon Deposition        |                          |                                   |
|--------|---------------------------------|--------------------------|-----------------------------------|---------------------------------|--------------------------|-----------------------------------|
|        | Raman Shift (cm <sup>-1</sup> ) | FWHM (cm <sup>-1</sup> ) | Intensity x 10 <sup>5</sup> (cps) | Raman Shift (cm <sup>-1</sup> ) | FWHM (cm <sup>-1</sup> ) | Intensity x 10 <sup>5</sup> (cps) |
| G mode | 1579                            | 15                       | 25.6                              | 1575                            | 41                       | 14.8                              |
|        |                                 |                          |                                   | 1536                            | 51                       | 25.3                              |
| D mode | 1359                            | 43                       | 6.2                               | 1328                            | 108                      | 43.9                              |
|        |                                 |                          |                                   | 1395                            | 77                       | 36.4                              |

Table S2

|          | Raman Shift (cm <sup>-1</sup> ) | FWHM (cm <sup>-1</sup> ) | Intensity x 10 <sup>5</sup> (cps) |
|----------|---------------------------------|--------------------------|-----------------------------------|
| Si TO    | 517                             | 5.4                      | 13.7                              |
| Silicene | 538                             | 11.2                     | 1.2                               |
